# Supplementary figures and images for: Discovery and characterization of a novel class of cyclic peptidic compounds inhibiting the subunit interaction of the protein kinase CK2α2β2 holoenzyme
Source: Royal Society of Chemistry journal article supplement (doi:10.1039/d6cb00095a), 2026-06-23

(a)

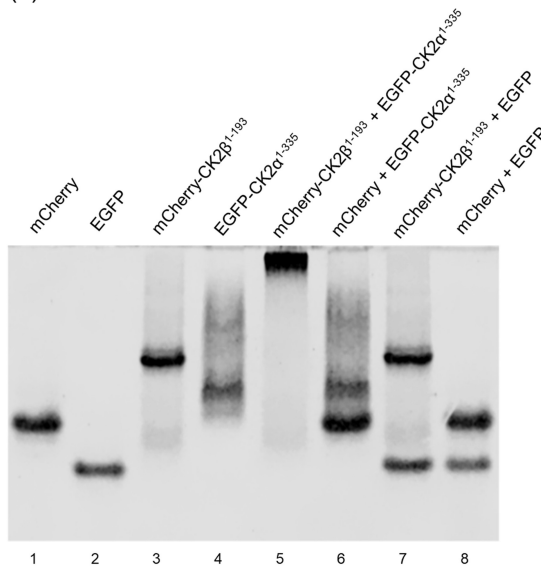

(b)

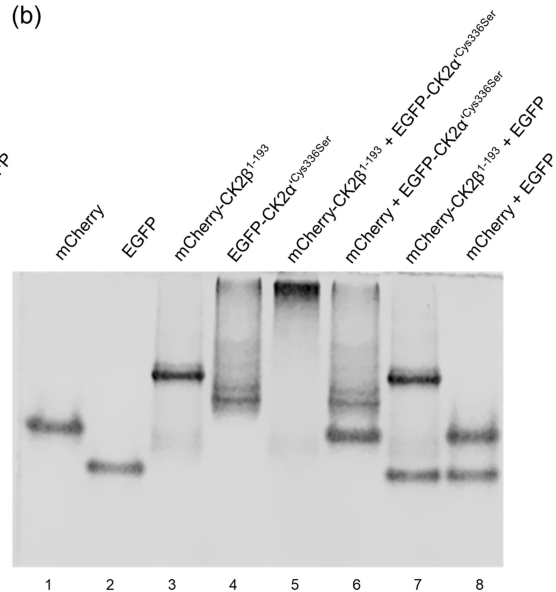

(c)

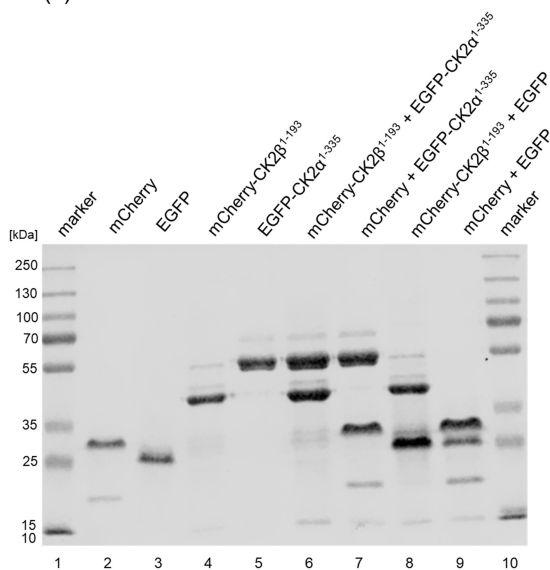

(d)

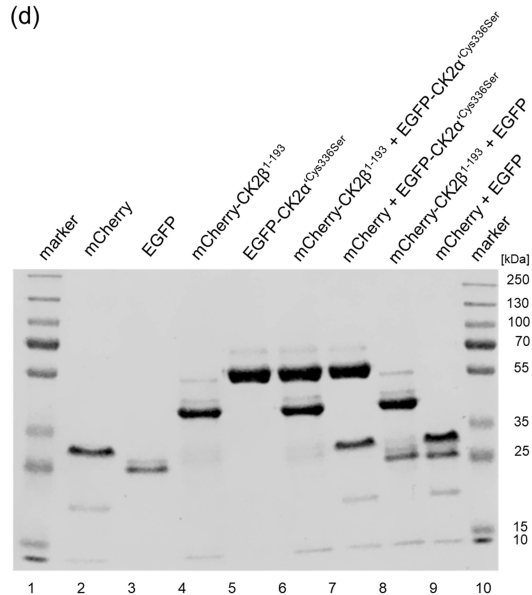

Supplement: d6cb00095a12.pdf [file d6cb00095a12.pdf]

(a)

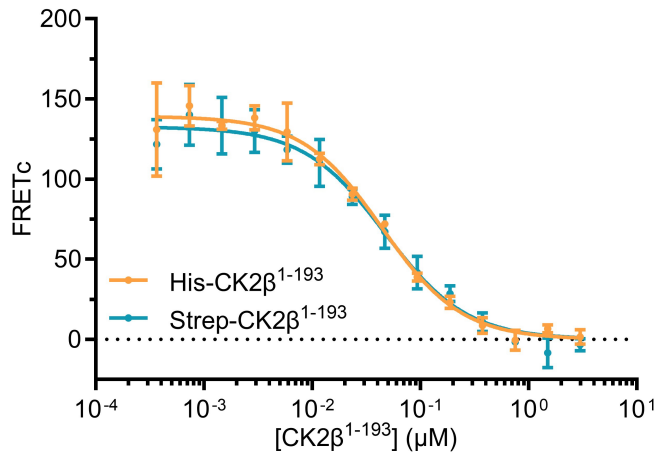

(b)

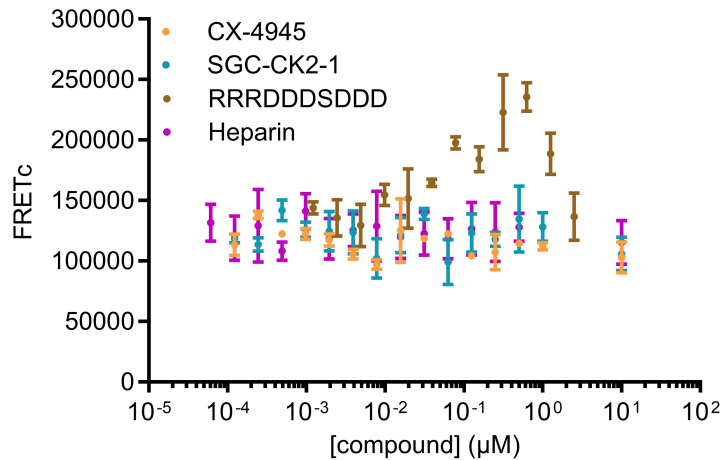

Supplement: d6cb00095a13.pdf [file d6cb00095a13.pdf]

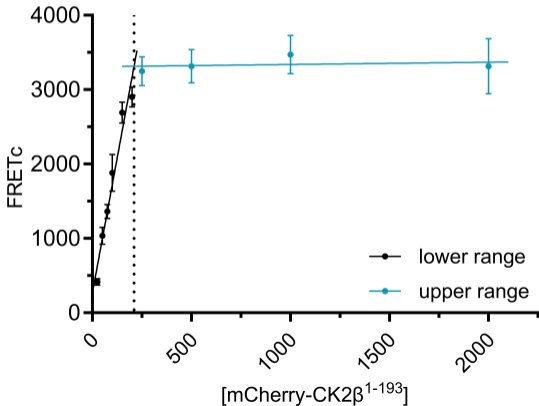

Supplement: d6cb00095a7.pdf [file d6cb00095a7.pdf]

(a)

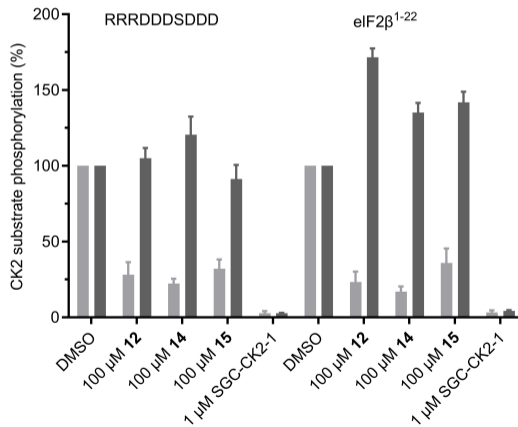

(b)

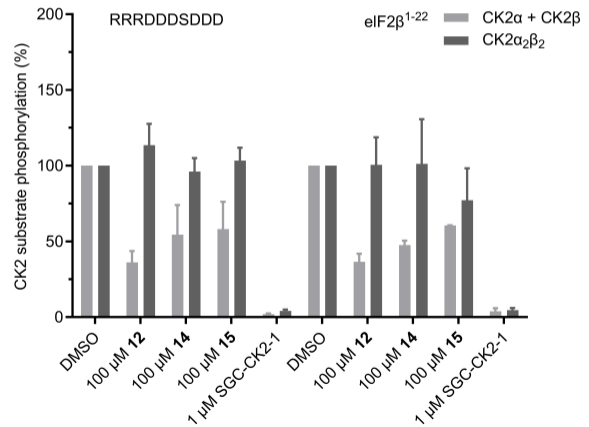

Supplement: d6cb00095a8.pdf [file d6cb00095a8.pdf]

(a)

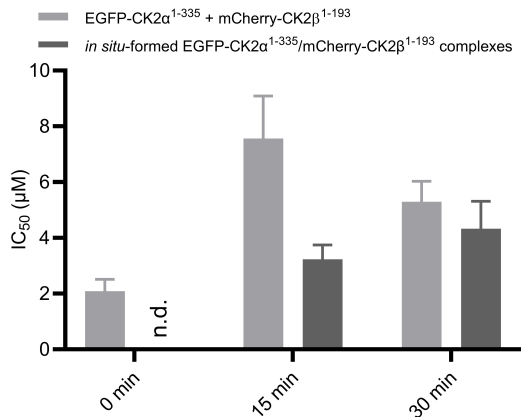

(b)

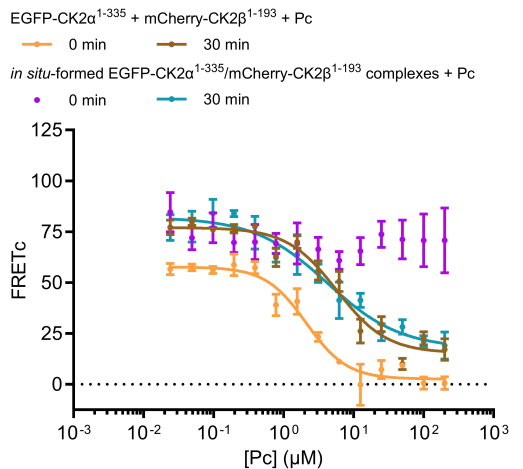

Supplement: d6cb00095a9.pdf [file d6cb00095a9.pdf]
